# Supplementary material
Source: PubMed Central journal article supplement (PMC7457448)
Supplement: NIHMS1615750-supplement-sFig1-s.pdf [file NIHMS1615750-supplement-sFig1-s.pdf]

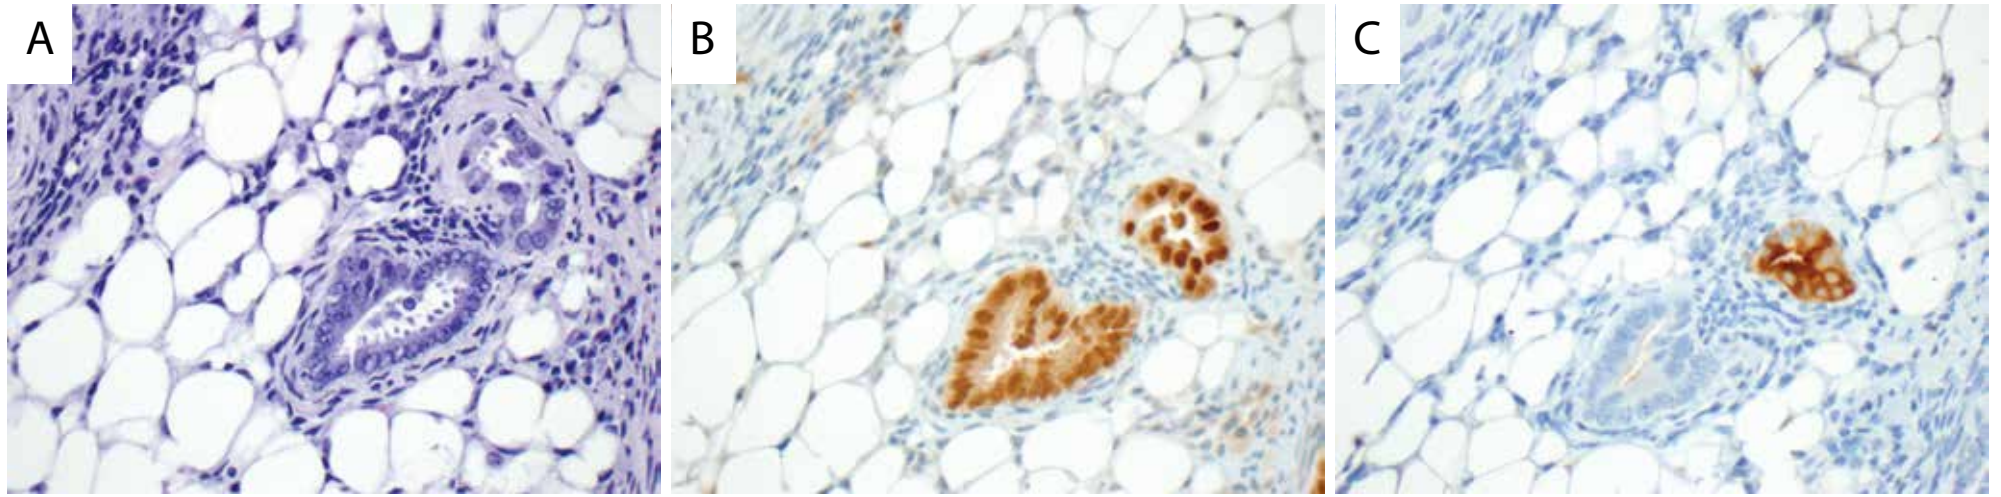

Supplementary Figure 1. Endosalpingiosis-like lesions are occasionally observed in the omentum. H&E stained section showing glands lined by columnar epithelium in omental fat (A). The cells lining the glands are positive for PAX8 (B) and focally positive for OVGP1 (C).
